# Supplementary material for: The Ensemble of Conformations of Antifreeze Glycoproteins (AFGP8): A Study Using Nuclear Magnetic Resonance Spectroscopy
Source: PubMed Central journal article supplement (PMC6628104; doi:10.3390/biom9060235), 2019-06-17
Supplement: biomolecules-09-00235-s001.pdf [file biomolecules-09-00235-s001.pdf]

Figure S1: The TOCSY-NOESY crosswalk of AFGP8-BS.

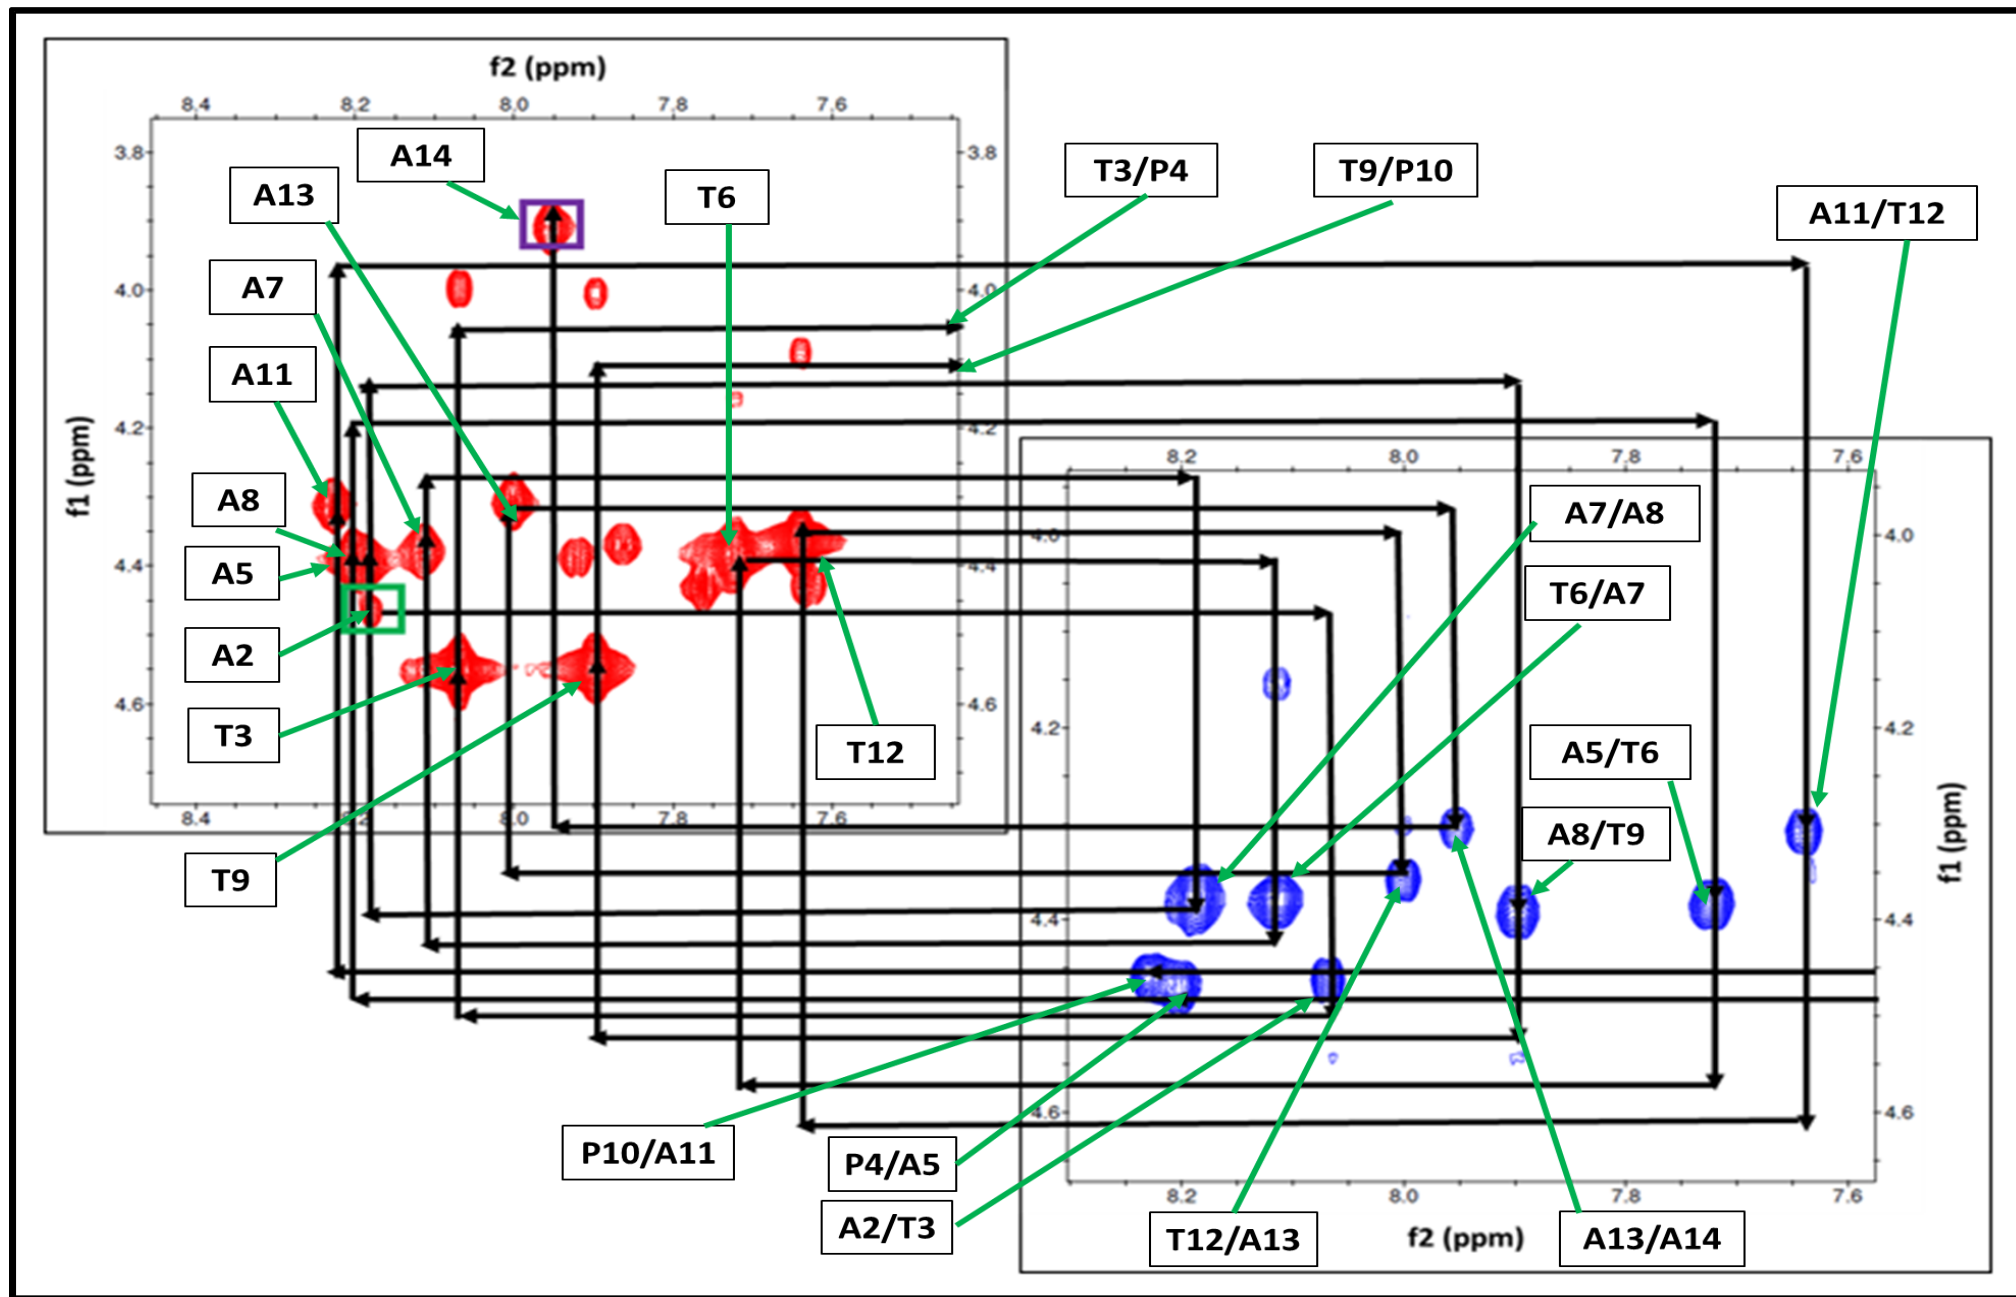

Figure S1

Figure S2: The TOCSY-NOESY crosswalk of AFGP8-TB.

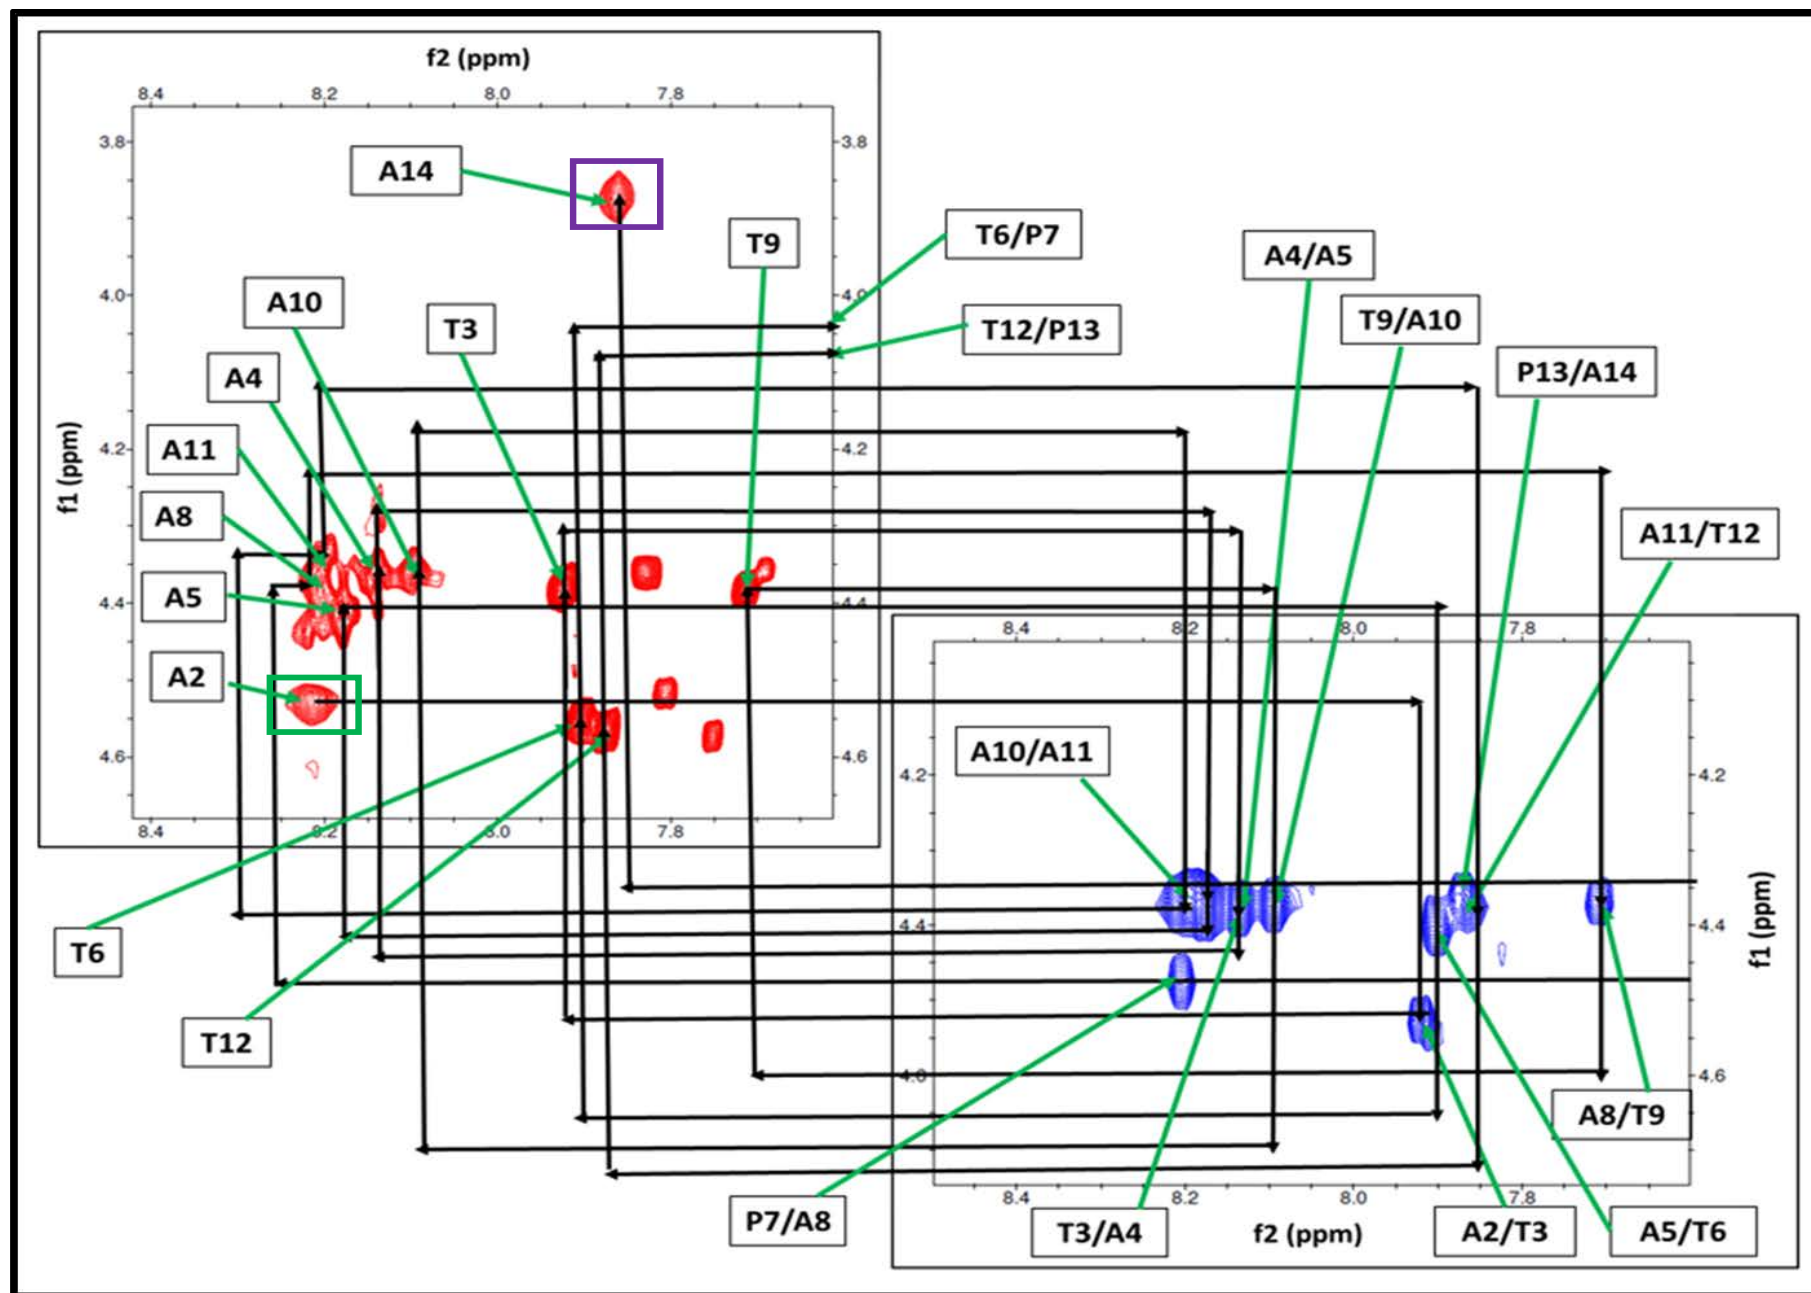

Figure S2

**Figure S3: The distribution of distance constraints**

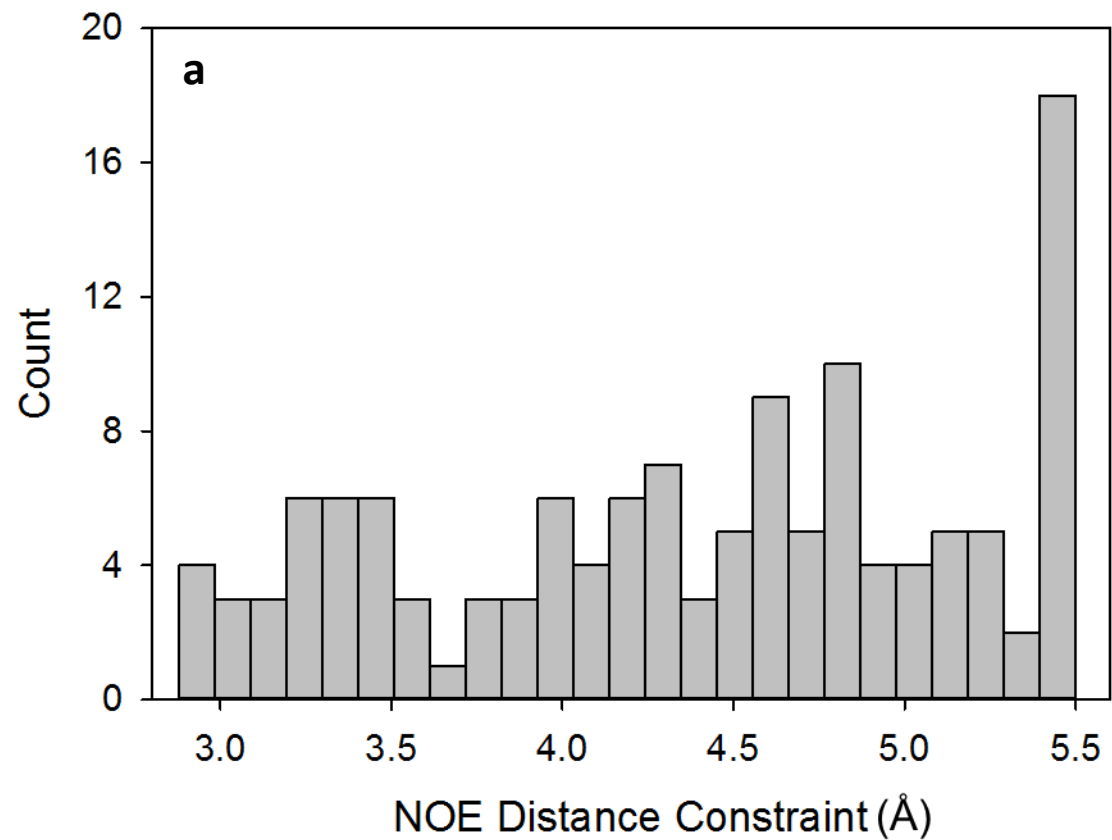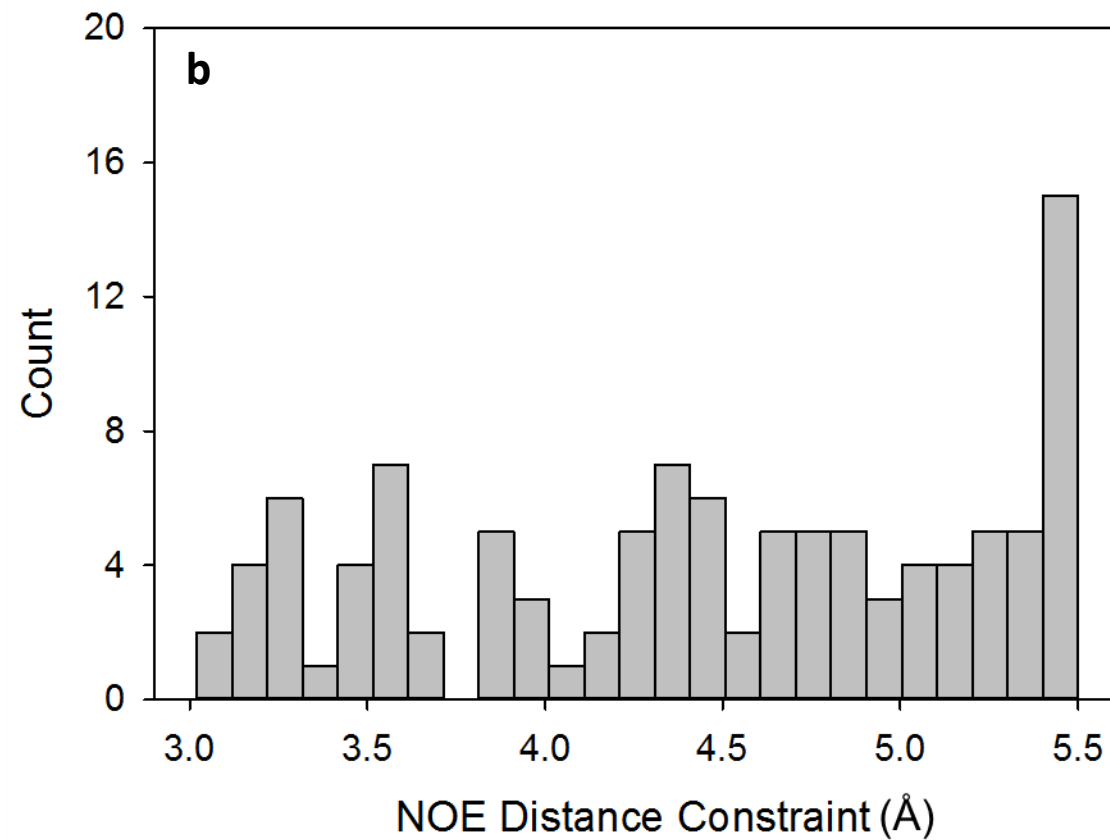

Figure S4: Comparison of the NMR determined Rg values of AFGP8-BS and AFGP8-TB

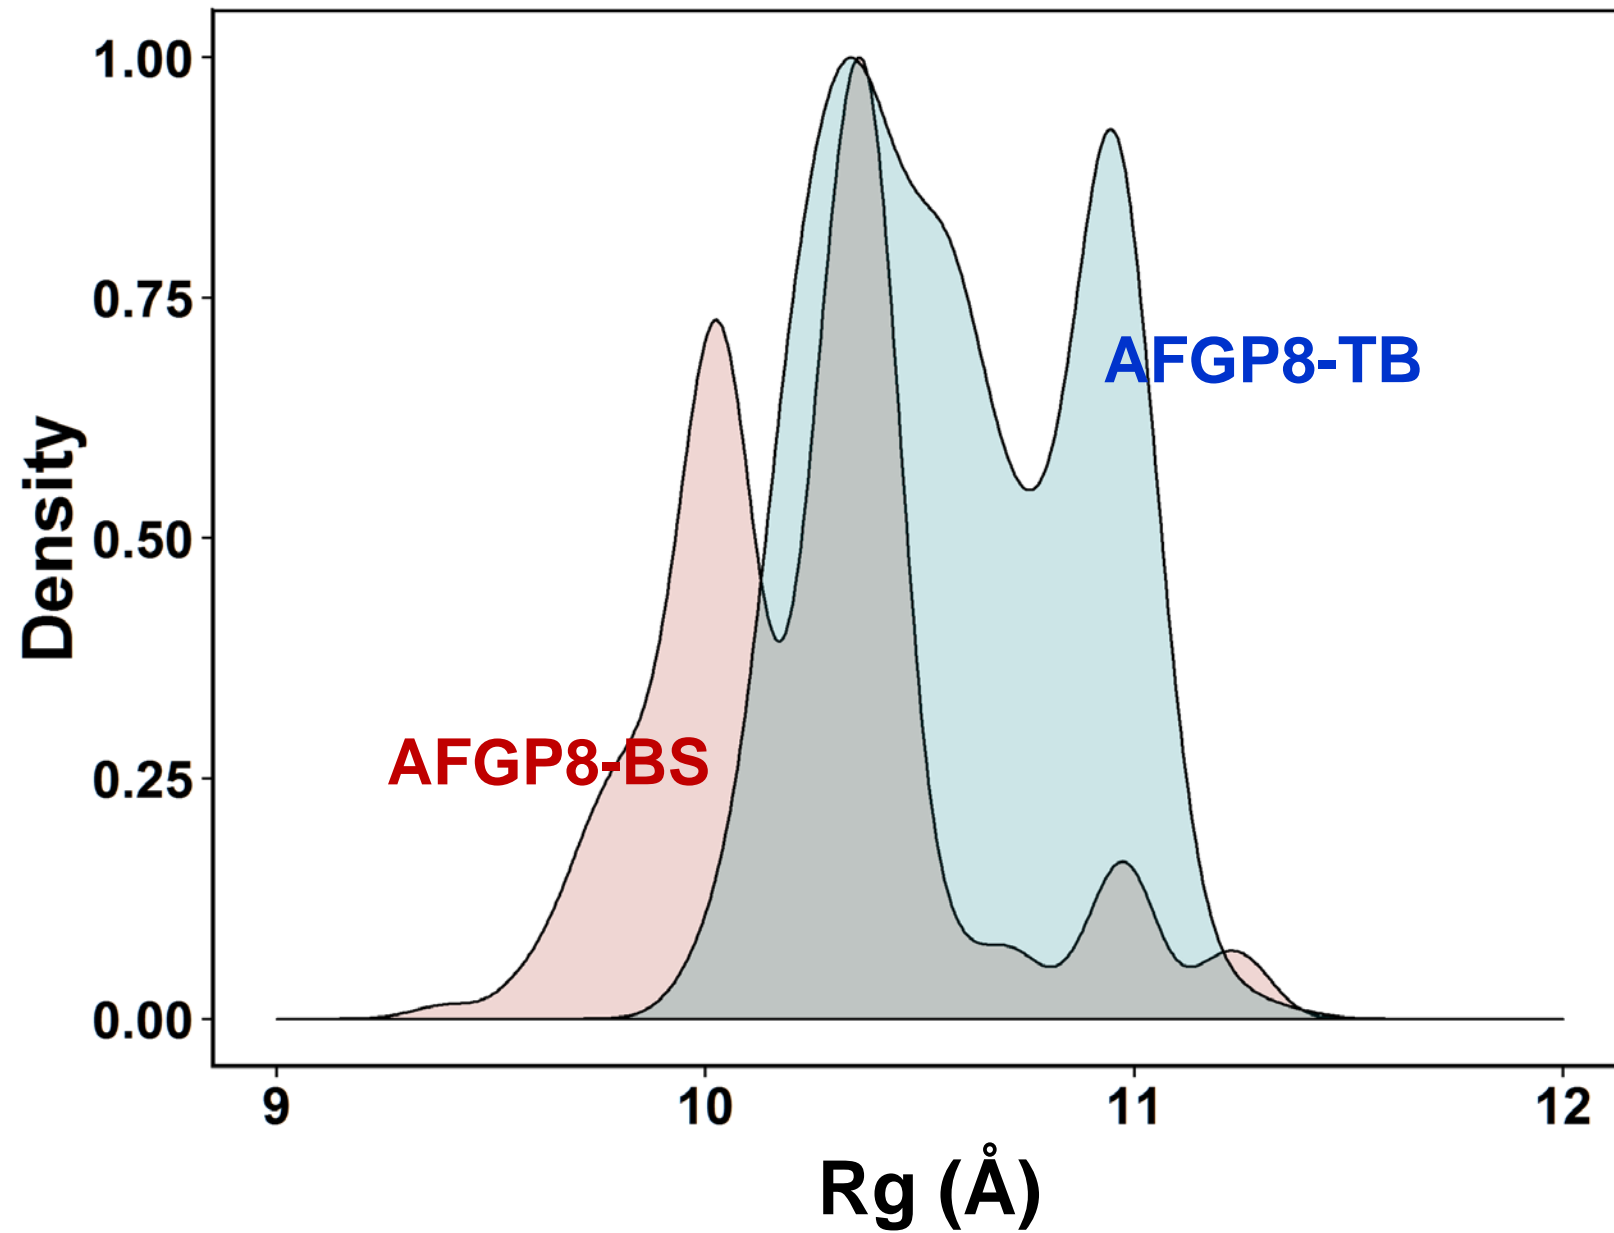

Figure S4

Table S1 – Three bond J-coupling constants ( $^3J_{\text{HN}\alpha}$ ) of AFGP8

| <b>BS</b> |                              | <b>TB</b> |                              |
|-----------|------------------------------|-----------|------------------------------|
| Residue   | $^3J_{\text{HN}\alpha}$ (Hz) | Residue   | $^3J_{\text{HN}\alpha}$ (Hz) |
| T*3       | 9.0                          | T*3       | 9.6                          |
| A5        | 7.8                          | A5        | 8.4                          |
| A7        | 9.0                          | T*6       | 10.2                         |
| A8        | 8.4                          | T*9       | 10.8                         |
| T*9       | 10.2                         | T*12      | 9.6                          |
| A11       | 8.4                          | A14       | 8.4                          |
| T*12      | 9.6                          |           |                              |
| A13       | 8.4                          |           |                              |
| A14       | 8.4                          |           |                              |

**Table S2 – Chemical shift assignments of the hydroxyl protons**

| a) AFGP8 from <i>Boreogadus saida</i> |                 |                 |                 |                 |
|---------------------------------------|-----------------|-----------------|-----------------|-----------------|
| Disaccharide                          | H <sup>O2</sup> | H <sup>O3</sup> | H <sup>O4</sup> | H <sup>O6</sup> |
| α3                                    | -               | -               | 4.45            | 4.63            |
| α6                                    | -               | -               | 4.40            | 4.62            |
| α9                                    | -               | -               | 4.42            | 4.63            |
| α12                                   | -               | -               | 4.35            | 4.62            |
| β3                                    | -               | 4.80            | 4.39            | 3.53            |
| β6                                    | 3.85            | 4.80            | 4.39            | 3.47            |
| β9                                    | 3.77            | 4.80            | 4.37            | 3.53            |
| β12                                   | -               | 4.80            | 4.35            | 3.47            |

  

| b) AFGP8 from <i>Pathogenia (Trematomus) borchgrevinki</i> |                 |                 |                 |                 |
|------------------------------------------------------------|-----------------|-----------------|-----------------|-----------------|
| Disaccharide                                               | H <sup>O2</sup> | H <sup>O3</sup> | H <sup>O4</sup> | H <sup>O6</sup> |
| α3                                                         | -               | -               | 4.43            | 4.62            |
| α6                                                         | -               | -               | 4.38            | 4.63            |
| α9                                                         | -               | -               | 4.45            | 4.62            |
| α12                                                        | -               | -               | 4.38            | 4.63            |
| β3                                                         | -               | 4.79            | 4.33            | 4.59            |
| β6                                                         | -               | 4.79            | 4.38            | 4.60            |
| β9                                                         | -               | 4.79            | 4.38            | 4.59            |
| β12                                                        | -               | 4.79            | 4.38            | 4.60            |

**Table S3: Number of NOEs and upper limit distance constraints**

|                                        | <b>AFGP8-BS</b>   | <b>AFGP8-TB</b>   |
|----------------------------------------|-------------------|-------------------|
| <b>Total NOE Distant Constraint</b>    | 131 ( <i>61</i> ) | 108 ( <i>49</i> ) |
| <b>Intraresidue</b>                    | 64                | 53                |
| <b>Sequential</b>                      | 53                | 45                |
| <b>Short-range</b>                     | 117               | 98                |
| <b>Medium-range</b>                    | 14                | 10                |
| <b>Long-range</b>                      | 0                 | 0                 |
|                                        |                   |                   |
| <b>Limit ( to 2.99 Å)</b>              | 4                 | 0                 |
| <b>Limit ( 3.00 to 3.99 Å)</b>         | 39                | 31                |
| <b>Limit ( 4.00 to 4.99 Å)</b>         | 54                | 44                |
| <b>Limit ( 5.00 to 5.99 Å)</b>         | 34                | 33                |
| <b>Limit ( 6.00 to Å)</b>              | 0                 | 0                 |
|                                        |                   |                   |
| <b>Average Backbone RMSD to Mean</b>   | $0.50 \pm 0.21$   | $1.05 \pm 0.19$   |
| <b>Average Heavy Atom RMSD to Mean</b> | $0.58 \pm 0.22$   | $1.18 \pm 0.23$   |
